# Supplementary material
Source: publisher site journal article supplement (https://www.dovepress.com/article/500670)
Supplement: Supplementary file 1 [file get_supplementary_file.php]

Supplementary Materials for

**Design, Synthesis, and Biological Evaluation of Novel Hydroxytyrosol Derivatives as Protectors for Vascular Endothelium Against Lipid Overload.**

Xi-Xi Hou1,2*, Shuang Wang1,3*, Xiao-Xia Ma1,2*, Ying Wen1,3*, Zhi-Jun Li4, Xu-Yun Liu5#, Xing Zhang3, Yang Zhang6, Xiang-Yang Qin2#

1College of Life Science, Northwestern University, Xi’an, China; 2Departmentof Chemistry, School of Pharmacy, Fourth Military Medical University, Xi’an, China; Department of Recuperation and Rehabilitation for Flight Personnel, School of Aerospace Medicine, Fourth Military Medical University, Xi’an, China; 4School of Chemistry and Chemical Engineering, Shaanxi University of Science and Technology, Xi’an, China; 5Center for Mitochondrial Biology and Medicine, The Key Laboratory of Biomedical Information Engineering of Ministry of Education, School of Life Science and Technology, Xi’an Jiao tong University, Xi’an, China; 6Department of Medical Electronics, School of Biomedical Engineering, Fourth Military Medical University, Xi’an, China.

*These authors contributed equally to this work

#Correspondence: Xu-Yun Liu, Center for Mitochondrial Biology and Medicine, The Key Laboratory of Biomedical Information Engineering of Ministry of Education, School of Life Science and Technology, Xi’an Jiao tong University, Xi’an, Shaanxi Province, 710049, China, Email: xuyunliu@xjtu.edu.cn (X. Liu); Xiang-Yang Qin, Department of Chemistry, School of Pharmacy, Fourth Military Medical University, Xi’an, Shaanxi Province, 710032, China, Email:qinxiangyang@fmmu.edu.cn (X. Qin).

**Contents**

Ⅰ. mRNA primers used in the study.

Ⅱ. 1HNMR, 13CNMR and HRMS for all synthesized compounds.

Ⅲ. HPLC chromatogram for all the tested compounds.

Ⅰ. **Table S1. mRNA primers used in the study.**

Supplementary Table S1 Primers

| Species | Gene | Sequence (5’-3’) |
| --- | --- | --- |
| Human | ACTIN | Forward : ATCATGTTTGAGACCTTCAA |
| Reverse: AGATGGGCACAGTGTGGGT |
| Human | IL-6 | Forward: TTTTGTACTCATCTGCACAGC |
| Reverse: GGATTCAATGAGGAGACTTGC |
| Human | MMP-1 | Forward: ACGCCAGATTTGCCAAGAG |
| Reverse: TTGACCCTCAGAGACCTTGGT |
| Human | ICAM-1 | Forward: CTATGGCAACGACTCCTTCT |
| Reverse: CAGCGTCACCTTGGCTCTA |
| Human | VEGFA | Forward: TGGAGCGTGTACGTTGGTG |
| Reverse: ATGGGCTGCTTCTTCCAACA |
| D-loop | Forward: CAGTACCTAACAAACCCACA |
| Reverse: GAGGTCGTAAACCCTATTGT |
| 18S rRNA | Forward: CAGCCACCCGAGATTGAGCA |
| Reverse: TAGTAGCGACGGGCGGTGTG |

Ⅱ**.** **1HNMR, 13CNMR, and HRMS spectrum for all synthesized compounds.**

Figure S1. HRMS spectrum of compound **1.**

Figure S2. HRMS spectrum of compound **3.**


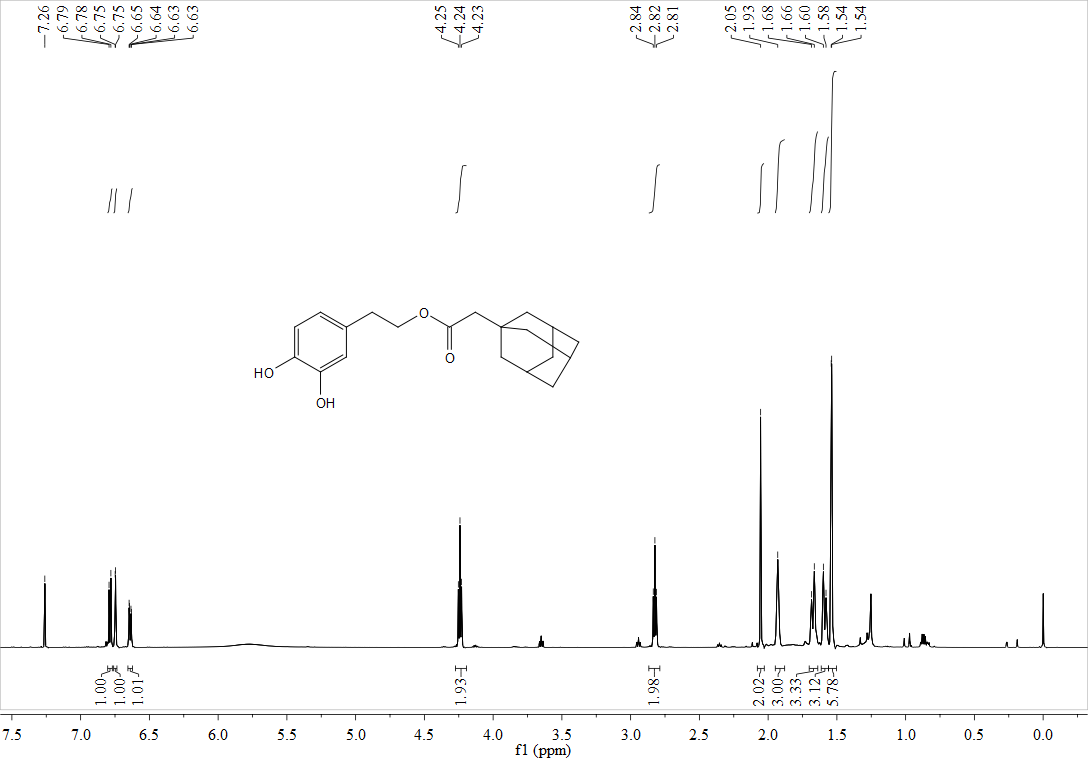


Figure S3. 1H NMR spectrum of **HT-ADM** (600 MHz, CDCl3).


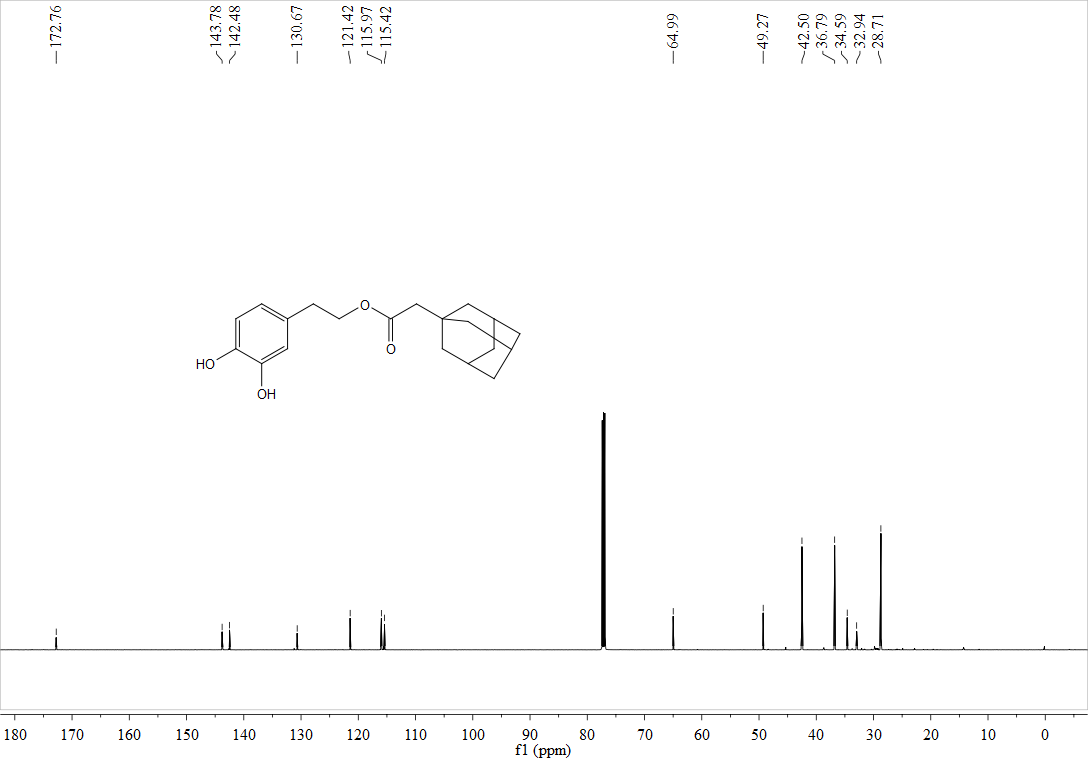


Figure S4. 13C NMR spectrum of **HT-ADM** (151 MHz, CDCl3).

Figure S5. HRMS spectrum of **HT-ADM.**


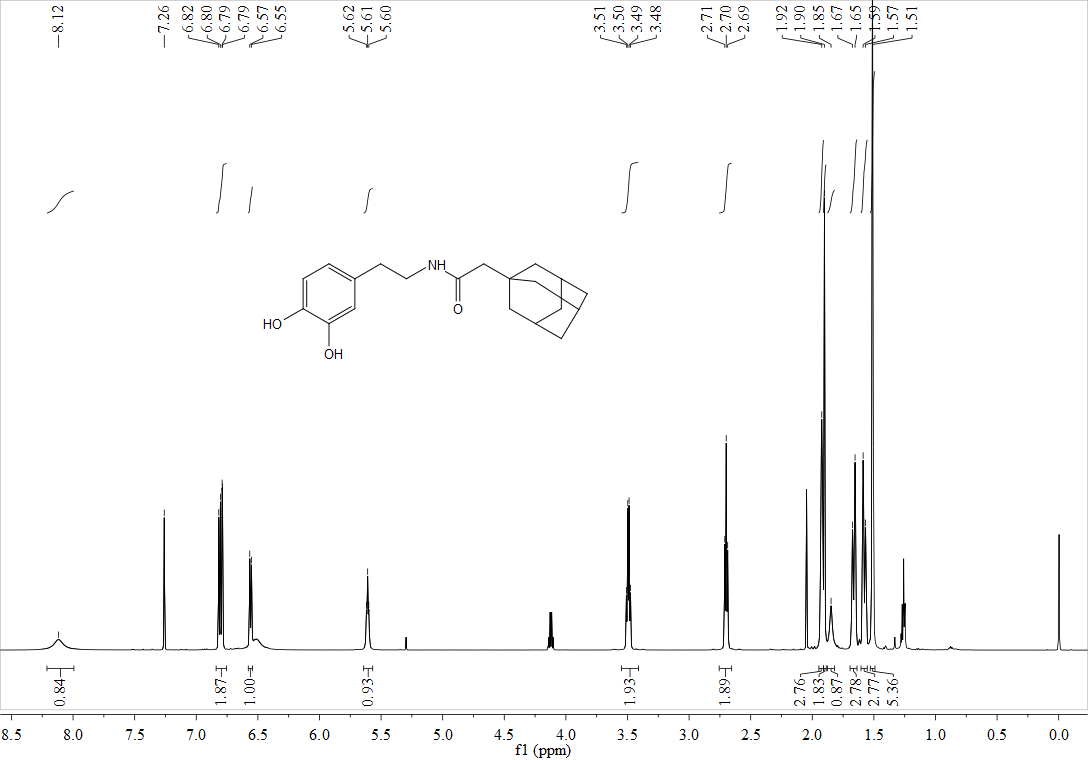


Figure S6. 1H NMR spectrum of **DP-ADM** (600 MHz, CDCl3).


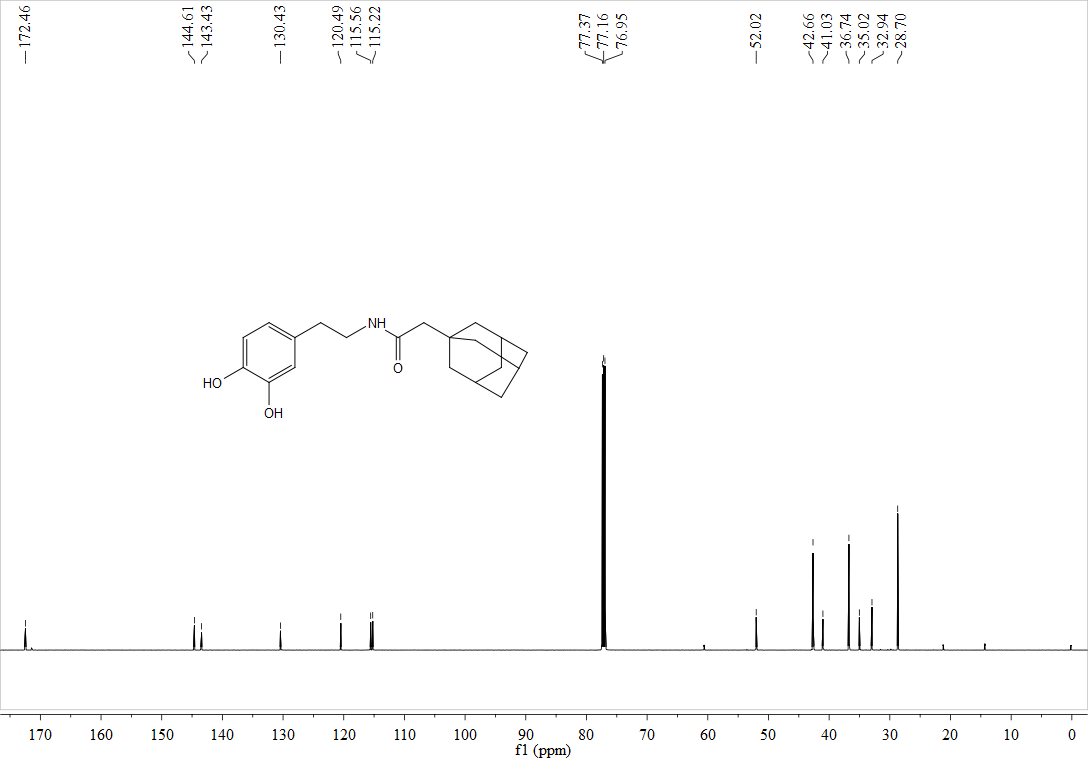


Figure S7. 13C NMR spectrum of **DP-ADM** (151 MHz, CDCl3).

Figure S8. HRMS spectrum of **DP-ADM.**


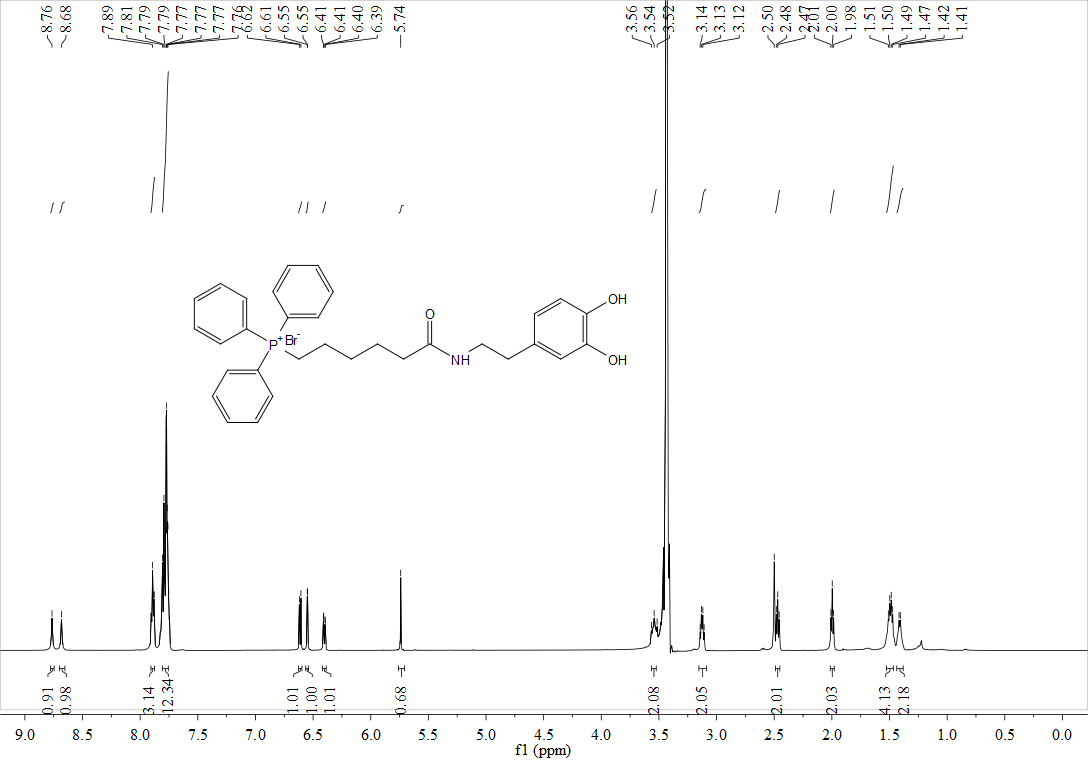


Figure S9. 1H NMR spectrum of **DP-TPP** (600 MHz, DMSO).


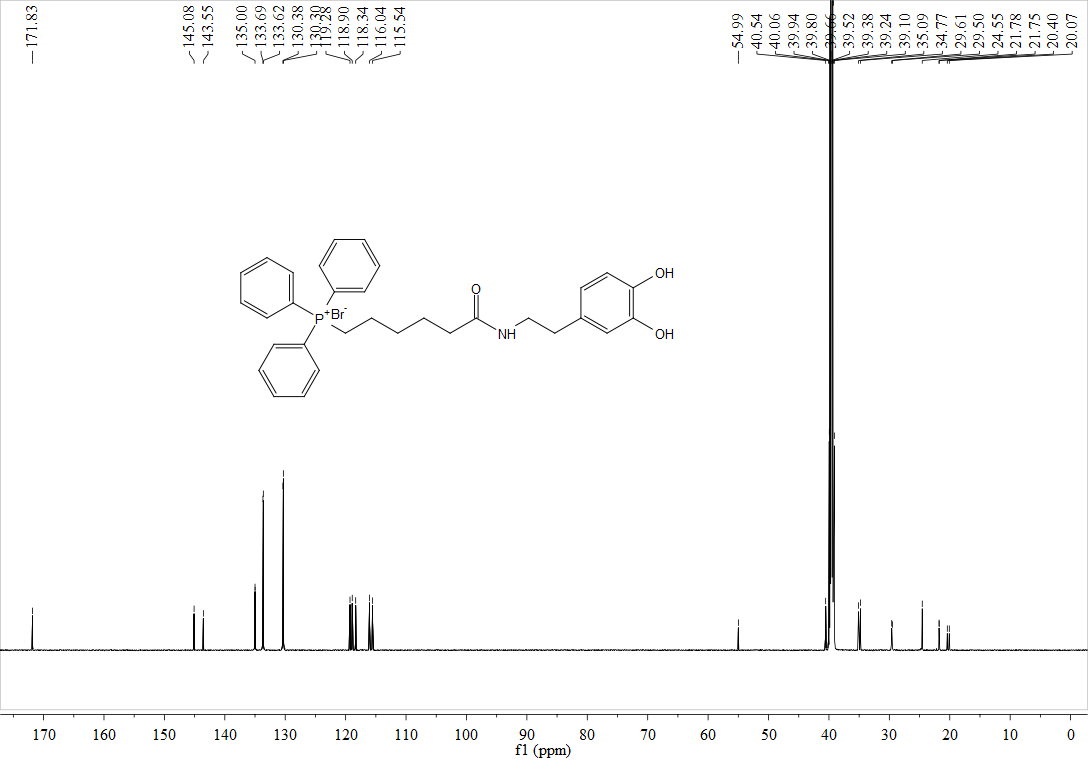


Figure S10. 13C NMR spectrum of **DP-TPP** (151 MHz, DMSO).

Figure S11. HRMS spectrum of **DP-TPP.**


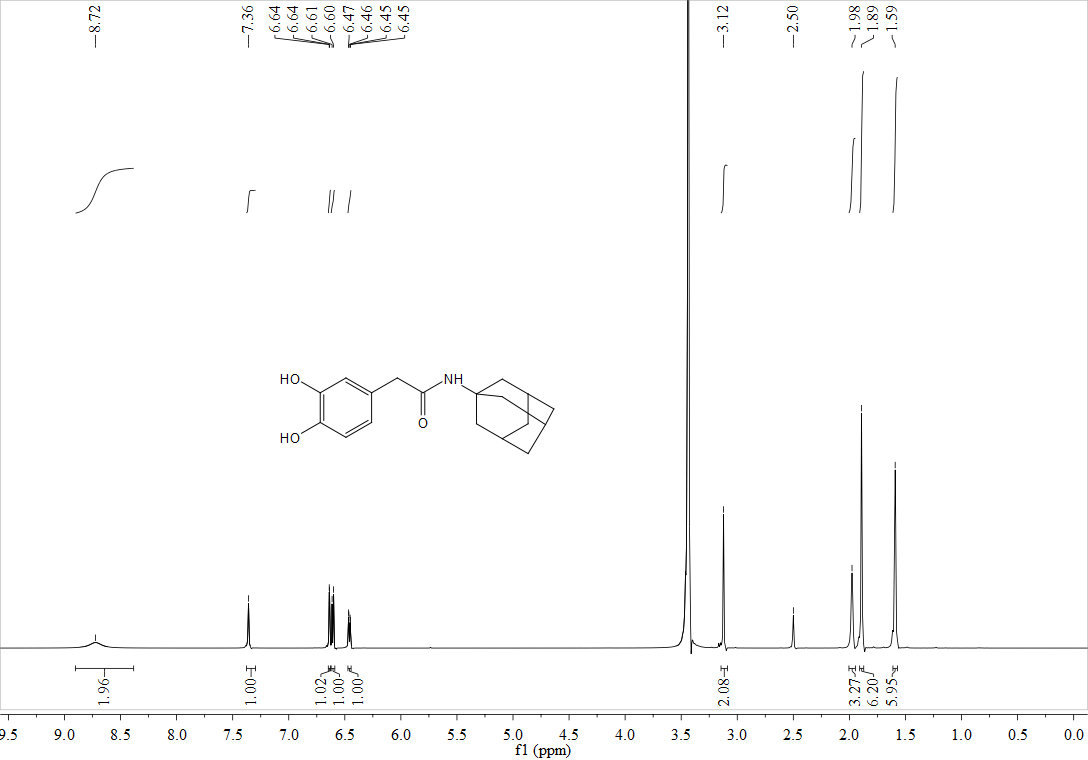


Figure S12. 1H NMR spectrum of **DOP-ADM** (600 MHz, CDCl3).


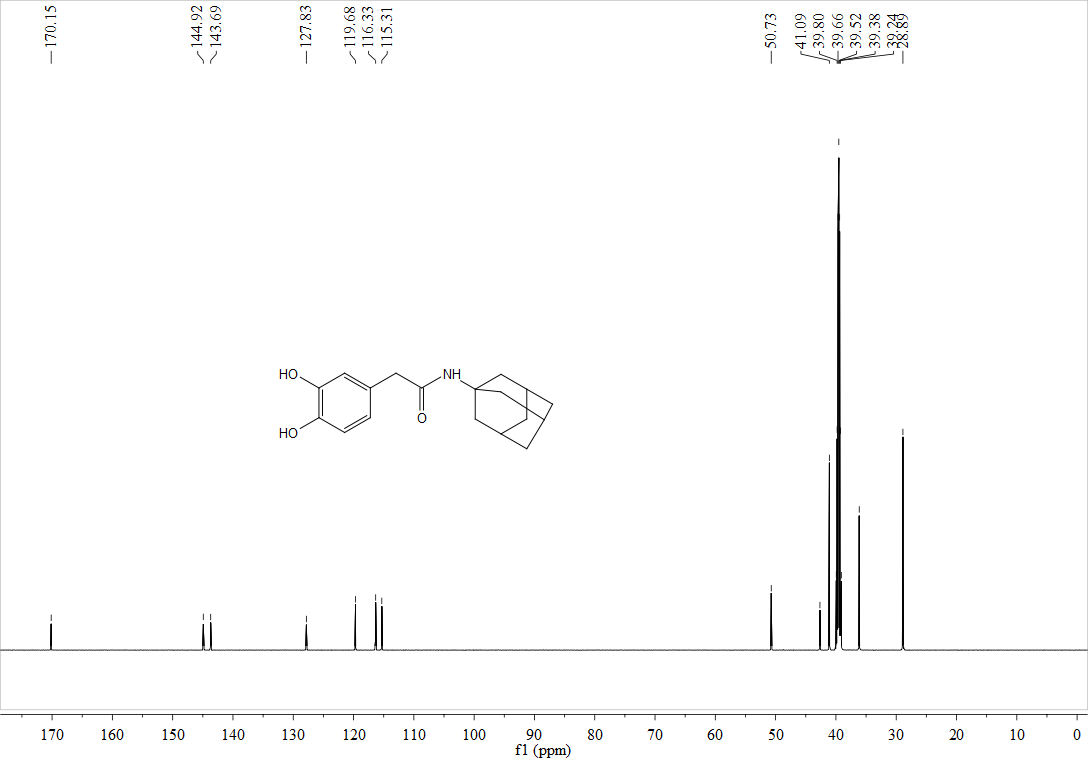


Figure S13. 13C NMR spectrum of **DOP-ADM** (151 MHz, CDCl3).

Figure S14. HRMS spectrum of **DOP-ADM.**

**Ⅲ. HPLC chromatogram for all the tested compounds.**

Column Type: Agilent 5 HC-C18 column (4.6 × 250 mm, 10 μm). Flow Rate: 1 mL/min. Solvent Composition: Acetonitrile and water (70/30, v/v).


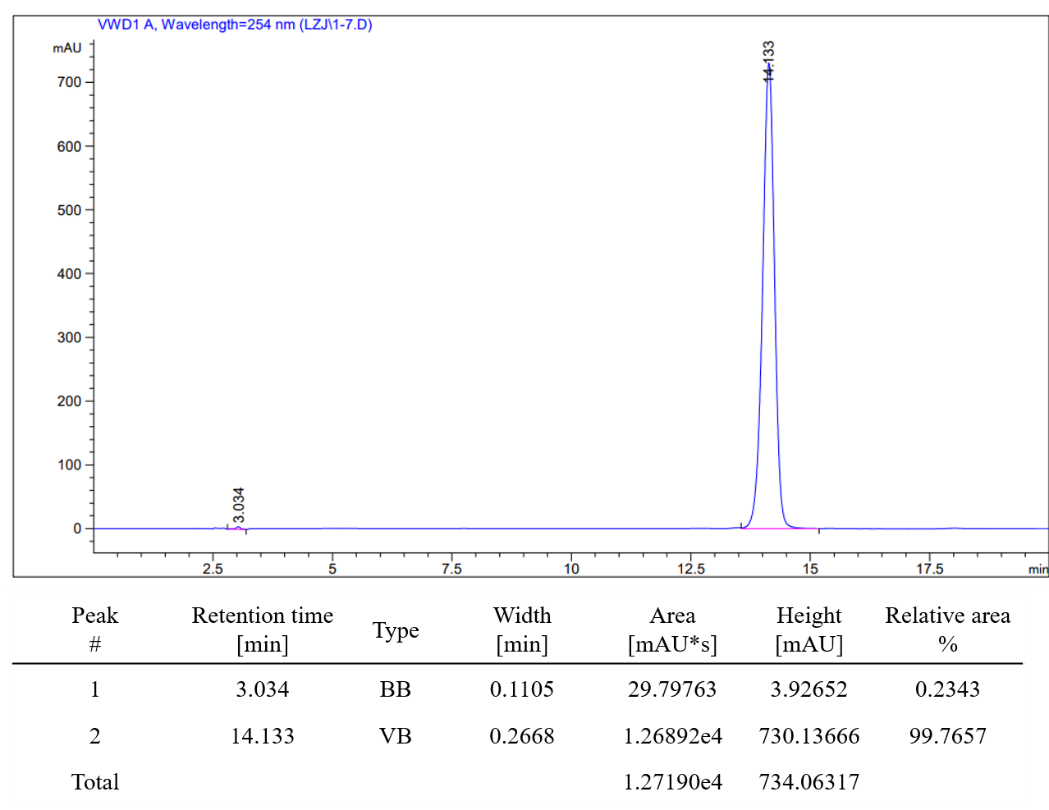


Figure S15. HPLC chromatogram of **HT-ADM**.


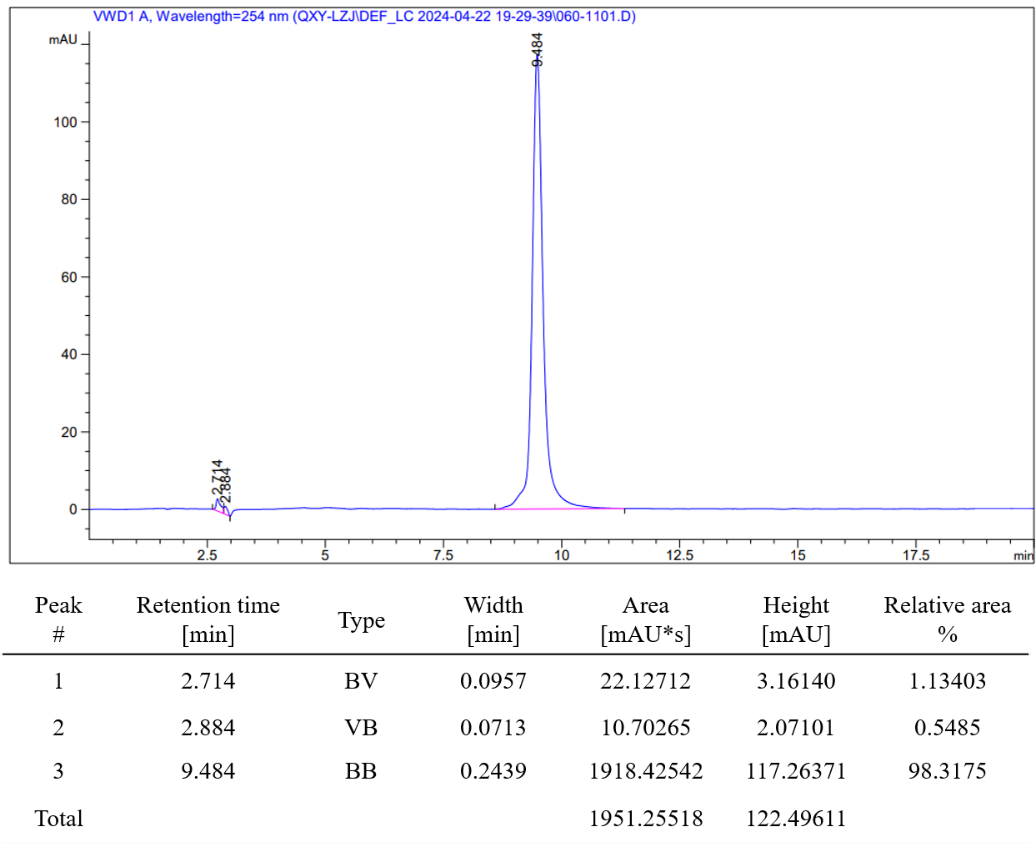


Figure S16. HPLC chromatogram of **DP-ADM**.


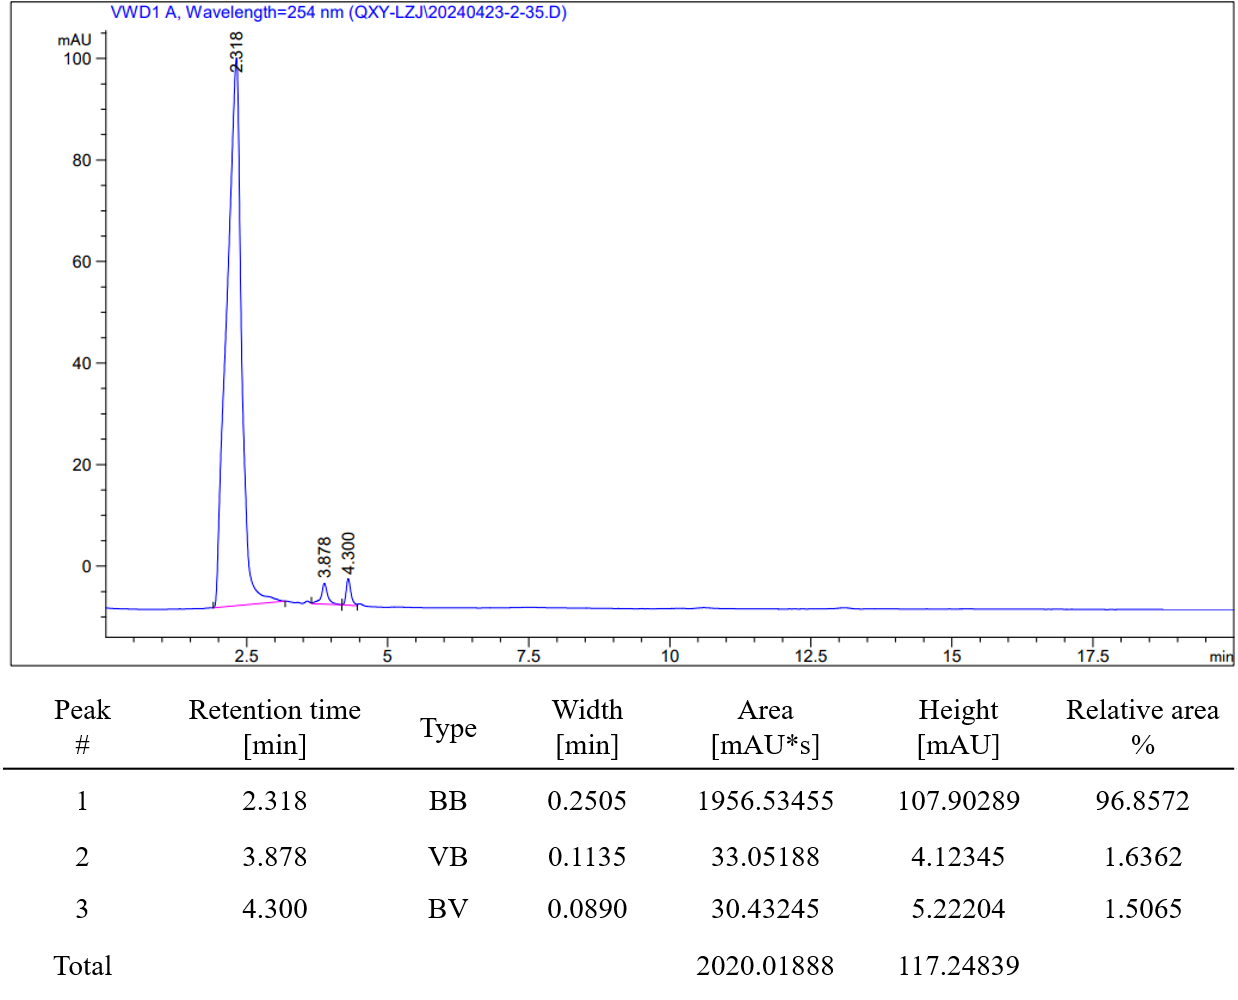


Figure S17. HPLC chromatogram of **DP-TPP**.


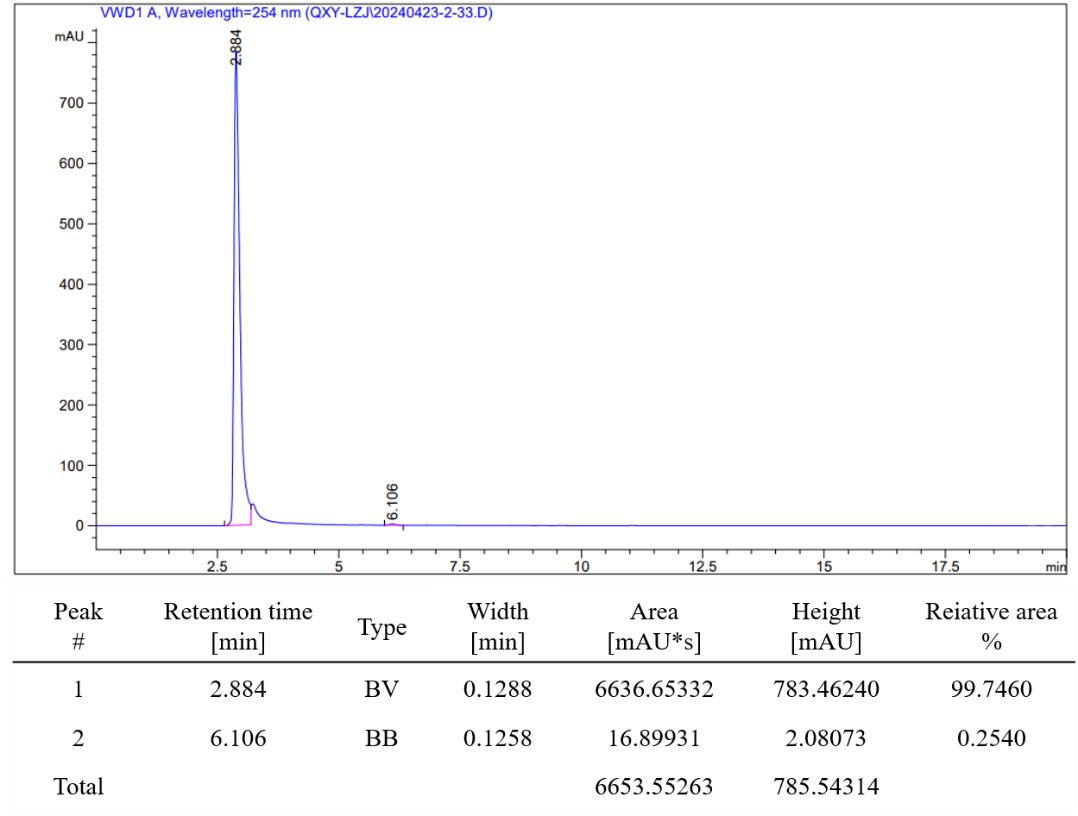


Figure S18. HPLC chromatogram of **DOP-ADM**.
